# Supplementary material
Source: PubMed Central journal article supplement (PMC549456)

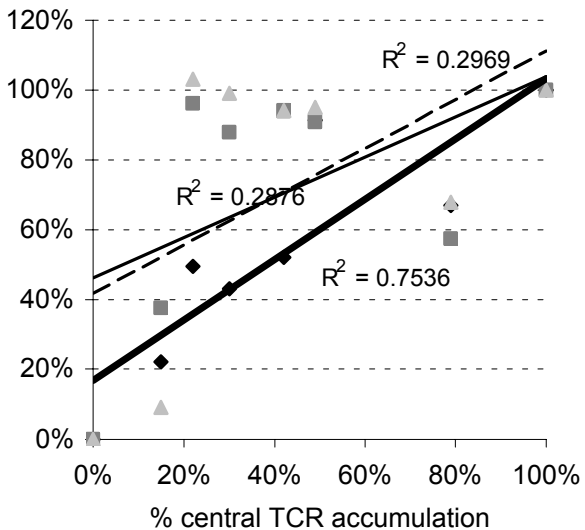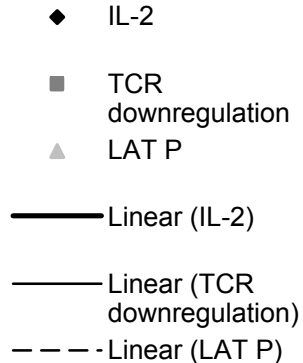

Supplement: pnas_102_8_2904__4.pdf [file pnas_102_8_2904__4.pdf]

**A**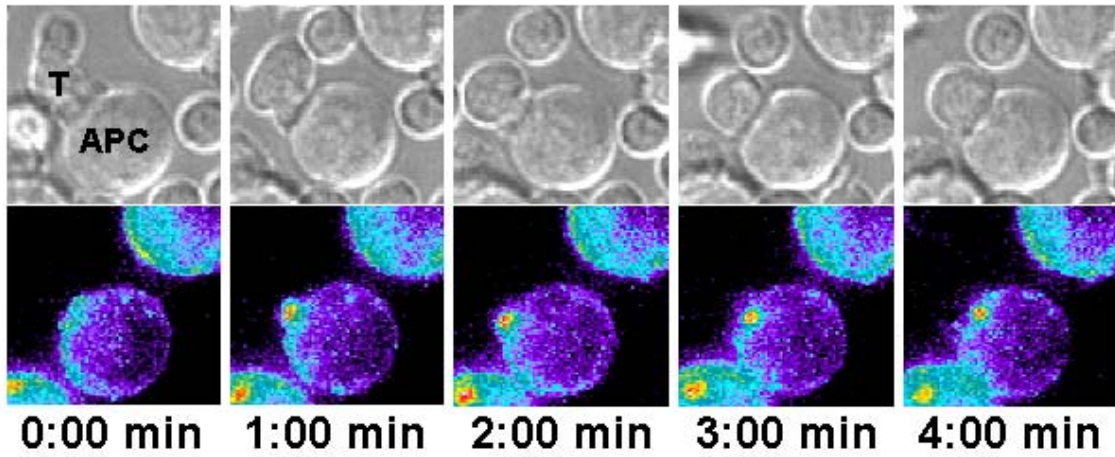**B**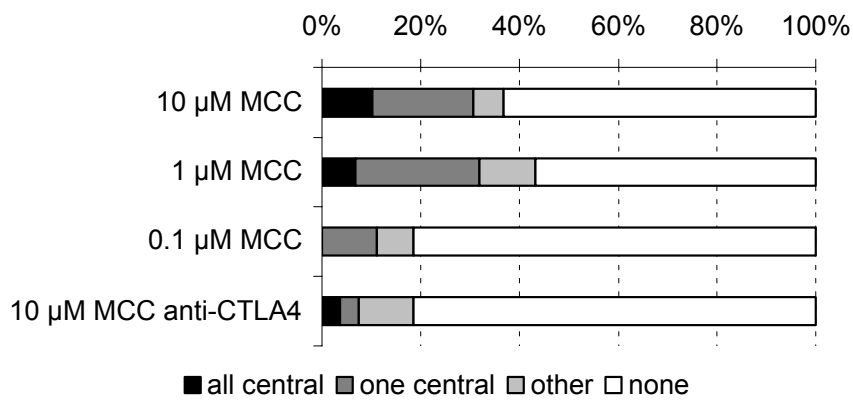**C**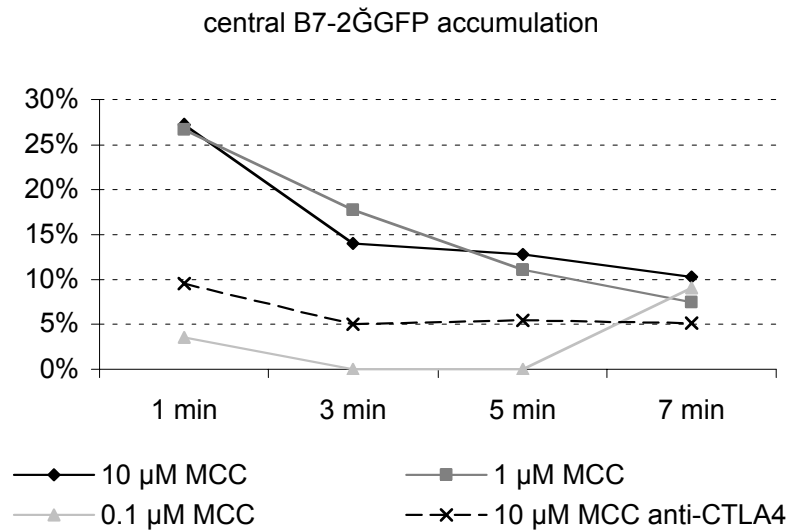

Supplement: pnas_102_8_2904__5.pdf [file pnas_102_8_2904__5.pdf]
